# Supplementary material for: Baduanjin improves neck pain and functional movement in middle-aged and elderly people: A systematic review and meta-analysis of randomized controlled trials
Source: PubMed Central journal article supplement (PMC9871642; doi:10.3389/fmed.2022.920102), 2023-01-10
Supplement: Data_Sheet_1.pdf [file Data_Sheet_1.pdf]

## Pubmed/(MEDLINE) 6

| Search | Actions | Details | Query                                                                                                                                                                                                                        | Results | Time     |
|--------|---------|---------|------------------------------------------------------------------------------------------------------------------------------------------------------------------------------------------------------------------------------|---------|----------|
| #3     | ...     | >       | Search: (Neck Pains OR Neck Ache OR Neck Aches OR Cervical Pain OR Pos-terior Cervical Pain OR Posterior Neck Pains OR anterior neck pain OR anterior cervical pain) AND (Baduanjin OR Eight-section Brocade OR Ba duan jin) | 6       | 04:39:35 |
| #2     | ...     | >       | Search: Neck Pains OR Neck Ache OR Neck Aches OR Cervical Pain OR Pos-terior Cervical Pain OR Posterior Neck Pains OR anterior neck pain OR anterior cervical pain                                                           | 50,673  | 04:39:05 |
| #1     | ...     | >       | Search: Baduanjin OR Eight-section Brocade OR Ba duan jin                                                                                                                                                                    | 189     | 04:37:48 |

#1. "Baduanjin"[All Fields] OR ("Eight-section"[All Fields] AND "Brocade"[All Fields])  
189 results

#2. "neck pain"[MeSH Terms] OR ("neck"[All Fields] AND "pain"[All Fields]) OR "neck pain"[All Fields] OR ("neck"[All Fields] AND "pains"[All Fields]) OR "neck pains"[All Fields] OR ("neck pain"[MeSH Terms] OR ("neck"[All Fields] AND "pain"[All Fields]) OR "neck pain"[All Fields] OR ("neck"[All Fields] AND "ache"[All Fields]) OR "neck ache"[All Fields]) OR ("neck pain"[MeSH Terms] OR ("neck"[All Fields] AND "pain"[All Fields]) OR "neck pain"[All Fields] OR ("neck"[All Fields] AND "aches"[All Fields]) OR "neck aches"[All Fields]) OR ("neck pain"[MeSH Terms] OR ("neck"[All Fields] AND "pain"[All Fields]) OR "neck pain"[All Fields] OR ("cervical"[All Fields] AND "pain"[All Fields]) OR "cervical pain"[All Fields]) OR ("Pos-terior"[All Fields] AND ("neck pain"[MeSH Terms] OR ("neck"[All Fields] AND "pain"[All Fields]) OR "neck pain"[All Fields] OR ("cervical"[All Fields] AND "pain"[All Fields]) OR "cervical pain"[All Fields])) OR ("neck pain"[MeSH Terms] OR ("neck"[All Fields] AND "pain"[All Fields]) OR "neck pain"[All Fields] OR ("posterior"[All Fields] AND "neck"[All Fields] AND "pains"[All Fields])) OR ("neck pain"[MeSH Terms] OR ("neck"[All Fields] AND "pain"[All Fields]) OR "neck pain"[All Fields] OR ("anterior"[All Fields] AND "neck"[All Fields] AND "pain"[All Fields]) OR "anterior neck pain"[All Fields]) OR ("neck pain"[MeSH Terms] OR ("neck"[All Fields] AND "pain"[All Fields]) OR "neck pain"[All Fields] OR ("anterior"[All Fields] AND "cervical"[All Fields] AND "pain"[All Fields]) OR "anterior cervical pain"[All Fields]) 50673 results

#3. #1AND#2 6 results

## Embase 8



Results

#1 AND #2

Search > Mapping ▾ Date ▾ Sources ▾ Fields ▾ Quick limits ▾ EBM ▾ Pub. types ▾ Languages ▾ Gender ▾ Age ▾ Animal ▾

**Results Filters**

+ Expand — Collapse all Apply >

Sources ▾

Drugs ▾

Diseases ▾

History Save | Delete | Print view | Export | Email Combine > using  And  Or

#3 #1 AND #2

#2 neck AND pain

#1 baduanjin OR 'eight section brocade' OR 'ba duan jin'

**8 results for search #3** [Set email alert](#) [Set RSS feed](#) [Search details](#) [Index miner](#)

Results View | Export | Email | Add to Clipboard





高级检索
专业检索
作者发文检索
句子检索

[一框式检索](#) | [知识元检索](#) | [引文检索](#)

文献分类

SU=八段锦 and SU=颈椎病

网络首发
 增强出版
 基金文献
 中英文扩展
 同义词扩展

时间范围: 发表时间  --  更新时间  不限 v

重置条件
检索
结果中检索

示例:

1) TI='生态' and KY='生态文明' and (AU % '陈'+ '王') 可以检索到篇名包括“生态”并且关键词包括“生态文明”并且作者为“陈”姓和“王”姓的所有文章;

2) SU='北京' and FT='环境保护' 可以检索到主题包括“北京”及“奥运”并且全文中包含“环境保护”的信息;

3) SU=(‘经济发展’+‘可持续发展’) and FT='泡沫' 可检索“经济发展”或“可持续发展”有关“转变”的信息,并且可以去除与“泡沫”有关的部分内容。

总库
76

中文
62

外文
62

学术期刊
12

学位论文
0

会议
0

报纸
0

年鉴
0

图书
0

专利
0

标准
0

成果
1

高级检索
专业检索
作者发文检索

[? 了解高级检索](#)

文献类型: 全部清除 期刊论文 学位论文 会议论文 专利 中外标准 科技成果 法律法规 科技报告 地方志

检索信息:

|   |     |      |     |      |
|---|-----|------|-----|------|
| + | -   | 主题 v | 八段锦 | 模糊 v |
|   | 与 v | 主题 v | 颈椎病 | 模糊 v |
|   | 与 v | 题名 v |     | 模糊 v |

发表时间: 不限 v - 至今 v

智能检索: 中英文扩展 主题词扩展

检索
检索历史

主题:(八段锦) an...x
主题:(八段锦) an...x

检索表达式 (主题词扩展): 主题:(八段锦) and 主题:(颈椎病)

|           |                                                                                                                                                                                                                                                                                           |           |           |                                                                                                                                                                 |                                                                                             |
|-----------|-------------------------------------------------------------------------------------------------------------------------------------------------------------------------------------------------------------------------------------------------------------------------------------------|-----------|-----------|-----------------------------------------------------------------------------------------------------------------------------------------------------------------|---------------------------------------------------------------------------------------------|
| 资源类型 ^    | 排序: <span style="border: 1px solid #ccc; padding: 2px 5px;">相关性 v</span> <span style="border: 1px solid #ccc; padding: 2px 5px;">出版时间 v</span> <span style="border: 1px solid #ccc; padding: 2px 5px;">被引频次 v</span> <span style="border: 1px solid #ccc; padding: 2px 5px;">下载量 v</span> | 获取范围 v    | 显示 20 条 v | <span style="font-size: 12px;">☰</span> <span style="font-size: 12px;">☰</span> <span style="font-size: 12px;">☰</span> <span style="font-size: 12px;">☰</span> | <span style="font-size: 12px;">&lt;</span> 1 / 4 <span style="font-size: 12px;">&gt;</span> |
| 期刊论文 (79) | <input type="checkbox"/> 批量选择 (已选择 4 条) <span style="margin-left: 5px;">清除</span> <span style="margin-left: 5px;">批量引用</span> <span style="margin-left: 5px;">结果分析</span> <input type="checkbox"/> 只看核心期刊论文                                                                               | 找到 79 条结果 |           |                                                                                                                                                                 |                                                                                             |

### 高级检索 检索式检索

|        |        |        |        |    |
|--------|--------|--------|--------|----|
| 题名或关键词 | 八段锦    | 同义词扩展+ | 模糊     |    |
| 与      | 题名或关键词 | 颈椎病    | 同义词扩展+ | 模糊 |
| 与      | 作者     | 请输入检索词 | 模糊     |    |

时间限定

年份: 收录起始年 - 2022  更新时间: 一个月内

期刊范围

全部期刊  北大核心期刊  EI来源期刊  SCIE期刊  CAS来源期刊  CSCD期刊  CSSCI期刊

学科限定  全选

---

题名或关键词=八段锦 AND... x 题名或关键词=八段锦 AN... x

二次检索 共找到 53 篇文章 每页

### SinoMed 54

"八段锦"[常用字段:智能] AND "颈椎病"[常用字段:智能]



SinoMed  
中国生物医学文献服务系统

我的空间 帮助中心

首页 文献检索 引文检索 期刊检索 文献传递 数据服务

快速检索 高级检索 主题检索 分类检索 跨库检索

结果筛选

来源

- 中文文献(54)
- 西文文献(0)
- 博硕论文(0)
- 科普文献(4)

检索条件: "八段锦"[常用字段:智能] AND "颈椎病"[常用字段:智能]

年代  -  检索历史

全部: 54 | 核心期刊: 16 | 中华医学会期刊: 1 | 循证文献: 40

当前页 显示 题录 每页 20条 排序 入库
